# Supplementary material
Source: publisher figshare collection journal article supplement (https://karger.figshare.com/ndownloader/files/26530499)
Supplement: Supplementary file 1 [file 26530499]

**Part 1: To be filled in by the study doctor/assistant:**

| <b>Patient</b>                                                                                                 |                                                                                                                                                                                                                                                                                                                                                                                                                                                                                      |
|----------------------------------------------------------------------------------------------------------------|--------------------------------------------------------------------------------------------------------------------------------------------------------------------------------------------------------------------------------------------------------------------------------------------------------------------------------------------------------------------------------------------------------------------------------------------------------------------------------------|
| 1.00 Questionnaire number                                                                                      | <input type="checkbox"/> _____                                                                                                                                                                                                                                                                                                                                                                                                                                                       |
| 1.01 Age                                                                                                       | <input type="checkbox"/> _____ in years                                                                                                                                                                                                                                                                                                                                                                                                                                              |
| 1.02 Sex                                                                                                       | <input type="checkbox"/> Female<br><input type="checkbox"/> Male                                                                                                                                                                                                                                                                                                                                                                                                                     |
| 1.03 Eye diseases related to the presentation at the University Eye Hospital Bonn: (multiple answers possible) | <input type="checkbox"/> Cataract<br><input type="checkbox"/> Diabetic retinopathy<br><input type="checkbox"/> Glaucoma<br><input type="checkbox"/> Age-related macular degeneration<br><input type="checkbox"/> Vascular occlusion<br><input type="checkbox"/> Retinal detachment<br><input type="checkbox"/> Epiretinal gliosis<br><input type="checkbox"/> (suspicion of) monogenic retinal disease<br><input type="checkbox"/> Uveitis<br><input type="checkbox"/> Others: _____ |
| 1.04 Visus (c.c.m. or c.c.s.)                                                                                  | <input type="checkbox"/> RA _____<br><input type="checkbox"/> LA _____                                                                                                                                                                                                                                                                                                                                                                                                               |
| 1.05 Relationship to the University Eye Hospital Bonn                                                          | <input type="checkbox"/> First presentation on own initiative<br><input type="checkbox"/> Initial referral by family eye doctor<br><input type="checkbox"/> Outpatient follow-up (no surgery at the University Eye Hospital Bonn)<br><input type="checkbox"/> Outpatient follow-up (following surgical procedures at the University Eye Clinic Bonn [except IVOM])<br><input type="checkbox"/> Connection to IVOM consultation<br><input type="checkbox"/> Study patient             |
| 1.06 Insurance                                                                                                 | <input type="checkbox"/> Private health insurance<br><input type="checkbox"/> Public health insurance                                                                                                                                                                                                                                                                                                                                                                                |
| <b>accompanying person</b>                                                                                     |                                                                                                                                                                                                                                                                                                                                                                                                                                                                                      |
| 1.07 Age                                                                                                       | <input type="checkbox"/> _____ in years                                                                                                                                                                                                                                                                                                                                                                                                                                              |
| 1.08 Sex                                                                                                       | <input type="checkbox"/> Female<br><input type="checkbox"/> Male                                                                                                                                                                                                                                                                                                                                                                                                                     |
| 1.09 personal relation to patient                                                                              | <input type="checkbox"/> No<br><input type="checkbox"/> Spouse<br><input type="checkbox"/> Parent<br><input type="checkbox"/> Child<br><input type="checkbox"/> Grandparent<br><input type="checkbox"/> Friend<br><input type="checkbox"/> Other: _____                                                                                                                                                                                                                              |

**Part 2: To be filled in by the patient**

|                                                                                                                                                          |                                                                                                                                                                                                                                                                                                                                                                                                                                                                                                                                                                                                                                                                                                                      |
|----------------------------------------------------------------------------------------------------------------------------------------------------------|----------------------------------------------------------------------------------------------------------------------------------------------------------------------------------------------------------------------------------------------------------------------------------------------------------------------------------------------------------------------------------------------------------------------------------------------------------------------------------------------------------------------------------------------------------------------------------------------------------------------------------------------------------------------------------------------------------------------|
| 2.01 What language do you speak at home?                                                                                                                 | <input type="checkbox"/> _____                                                                                                                                                                                                                                                                                                                                                                                                                                                                                                                                                                                                                                                                                       |
| 2.02 Highest level of education                                                                                                                          | <input type="checkbox"/> No school leaving certificate<br><input type="checkbox"/> Primary school leaving certificate<br><input type="checkbox"/> Intermediate secondary school leaving certificate (Realschule)<br><input type="checkbox"/> Secondary school leaving certificate (Gymnasium)<br><input type="checkbox"/> Completed training for professional classification<br><input type="checkbox"/> Tertiary education<br><input type="checkbox"/> Doctorate degree                                                                                                                                                                                                                                             |
| 2.03 I generally have full trust in doctors:                                                                                                             | <input type="checkbox"/> Does apply (1)<br><input type="checkbox"/> Does rather apply (2)<br><input type="checkbox"/> Partly-partly (3)<br><input type="checkbox"/> Does rather not apply (4)<br><input type="checkbox"/> Does not apply (5)                                                                                                                                                                                                                                                                                                                                                                                                                                                                         |
| 2.04 Are you an organ donor (general) or do you have an organ donor card?                                                                                | <input type="checkbox"/> No<br><input type="checkbox"/> Yes (-> continue with question 2.06)                                                                                                                                                                                                                                                                                                                                                                                                                                                                                                                                                                                                                         |
| 2.05 If previous question was "No":<br>Which reasons do you give against <b>general organ donation</b> ?<br>(Multiple answers possible)                  | <input type="checkbox"/> I have no or not enough awareness of the topic<br><input type="checkbox"/> I am afraid or uncertain about death in organ donation process<br><input type="checkbox"/> I am afraid or uncertain about the distortion of my body in the donation process<br><input type="checkbox"/> I have religious, ethic or spiritual reasons against a donation<br><input type="checkbox"/> I believe that my organs are not suitable because of a preexisting disease<br><input type="checkbox"/> I believe that my organs are not suitable because of my age<br><input type="checkbox"/> I am afraid of abuse, have lack of trust (due to negative reporting)<br><input type="checkbox"/> Other: _____ |
| 2.06 Would you agree to donate your <b>eyes</b> after your death for one or more of the following purposes?<br>(Multiple answers possible)               | <input type="checkbox"/> No, I generally refuse to donate eyes (-> directly to question 2.9)<br><input type="checkbox"/> Yes, for tissue transplantation for immediate healing of another patient (e.g. cornea transplantation)<br><input type="checkbox"/> Yes, for research (e.g. microscopic examination of the retina)<br><input type="checkbox"/> Yes, for teaching medical students (e.g. training in anatomy)<br><input type="checkbox"/> Yes, for teaching prospective ophthalmologists (e.g. surgical training)<br><input type="checkbox"/> Other: _____                                                                                                                                                    |
| 2.07 If previous question was "Yes":<br>For a better organization of the donation process, I would be willing to enter a putative eye donation registry. | <input type="checkbox"/> Does apply (1)<br><input type="checkbox"/> Does rather apply (2)<br><input type="checkbox"/> Partly-partly (3)<br><input type="checkbox"/> Does rather not apply (4)<br><input type="checkbox"/> Does not apply (5) (-> continue with question 2.09)                                                                                                                                                                                                                                                                                                                                                                                                                                        |
| 2.08 If 2.07 was "1-4":<br>I would be willing to have my personal ophthalmological data stored in such a <u>hypothetical</u> registry.                   | <input type="checkbox"/> Does apply (1)<br><input type="checkbox"/> Does rather apply (2)<br><input type="checkbox"/> Partly-partly (3)<br><input type="checkbox"/> Does rather not apply (4)<br><input type="checkbox"/> Does not apply (5)                                                                                                                                                                                                                                                                                                                                                                                                                                                                         |

|                                                                                                                                                                     |                                                                                                                                                                                                                                                                                                                                                                                                                                                                                                                                                                                                                                                                                                                                                                                                              |
|---------------------------------------------------------------------------------------------------------------------------------------------------------------------|--------------------------------------------------------------------------------------------------------------------------------------------------------------------------------------------------------------------------------------------------------------------------------------------------------------------------------------------------------------------------------------------------------------------------------------------------------------------------------------------------------------------------------------------------------------------------------------------------------------------------------------------------------------------------------------------------------------------------------------------------------------------------------------------------------------|
| <p>2.09 What are the (most likely) reasons for you not to donate your <b>eyes</b> after death?<br/>(multiple answers possible)</p>                                  | <ul style="list-style-type: none"> <li><input type="checkbox"/> I have no or not enough awareness of the topic</li> <li><input type="checkbox"/> I am afraid or uncertain about death in organ donation process</li> <li><input type="checkbox"/> I am afraid or uncertain about the distortion of my body in the donation process</li> <li><input type="checkbox"/> I have religious, ethic or spiritual reasons against a donation</li> <li><input type="checkbox"/> I believe that my eyes are not suitable because of a preexisting disease</li> <li><input type="checkbox"/> I believe that my eyes are not suitable because of my age</li> <li><input type="checkbox"/> I am afraid of abuse, have lack of trust (due to negative reporting)</li> <li><input type="checkbox"/> Other: _____</li> </ul> |
| <p>2.10 <u>Regardless of my actual decision</u>, I think it would be appropriate for my ophthalmologist to address the topic of postmortem eye donation openly.</p> | <ul style="list-style-type: none"> <li><input type="checkbox"/> Does apply (1) - "It is a doctor's job to educate about this subject."</li> <li><input type="checkbox"/> Does rather apply (2)</li> <li><input type="checkbox"/> Partly-partly (3)</li> <li><input type="checkbox"/> Does rather not apply (4)</li> <li><input type="checkbox"/> Does not apply (5) - "It would be inappropriate to be addressed by my doctor on this subject"</li> </ul>                                                                                                                                                                                                                                                                                                                                                    |
| <p>2.11 I consider an education regarding the topic of <b>eye donation</b> to be appropriate through the following channels:<br/>(multiple answers possible)</p>    | <ul style="list-style-type: none"> <li><input type="checkbox"/> Personal education by ophthalmologist</li> <li><input type="checkbox"/> Personal education by medical assistant staff (e.g. medical assistant[r])</li> <li><input type="checkbox"/> Personal education by family doctor</li> <li><input type="checkbox"/> Education through an information leaflet</li> <li><input type="checkbox"/> Education via television, radio, internet</li> <li><input type="checkbox"/> Other: _____</li> </ul>                                                                                                                                                                                                                                                                                                     |
| <p>2.12 The opinion of my family members is an important factor in my decision regarding eye donation</p>                                                           | <ul style="list-style-type: none"> <li><input type="checkbox"/> Does apply (1)</li> <li><input type="checkbox"/> Does rather apply (2)</li> <li><input type="checkbox"/> Partly-partly (3)</li> <li><input type="checkbox"/> Does rather not apply (4)</li> <li><input type="checkbox"/> Does not apply (5)</li> </ul>                                                                                                                                                                                                                                                                                                                                                                                                                                                                                       |

**Part 3: To be completed by the accompanying person**

| The following questions refer to you personally (the accompanying person).                                                                  |                                                                                                                                                                                                                                                                                                                                                                                                                                                                                                                                                                                                                                                                                                                      |
|---------------------------------------------------------------------------------------------------------------------------------------------|----------------------------------------------------------------------------------------------------------------------------------------------------------------------------------------------------------------------------------------------------------------------------------------------------------------------------------------------------------------------------------------------------------------------------------------------------------------------------------------------------------------------------------------------------------------------------------------------------------------------------------------------------------------------------------------------------------------------|
| 3.01 What language do you speak at home?                                                                                                    | <input type="checkbox"/> _____                                                                                                                                                                                                                                                                                                                                                                                                                                                                                                                                                                                                                                                                                       |
| 3.02 Highest level of education                                                                                                             | <input type="checkbox"/> No school leaving certificate<br><input type="checkbox"/> Primary school leaving certificate<br><input type="checkbox"/> Intermediate secondary school leaving certificate (Realschule)<br><input type="checkbox"/> Secondary school leaving certificate (Gymnasium)<br><input type="checkbox"/> Completed training for professional classification<br><input type="checkbox"/> Tertiary education<br><input type="checkbox"/> Doctorate degree                                                                                                                                                                                                                                             |
| 3.03 I generally have full trust in doctors:                                                                                                | <input type="checkbox"/> Does apply (1)<br><input type="checkbox"/> Does rather apply (2)<br><input type="checkbox"/> Partly-partly (3)<br><input type="checkbox"/> Does rather not apply (4)<br><input type="checkbox"/> Does not apply (5)                                                                                                                                                                                                                                                                                                                                                                                                                                                                         |
| 3.04 Are you an <b>organ donor</b> (general) or do you have an organ donor card?                                                            | <input type="checkbox"/> No<br><input type="checkbox"/> Yes (-> continue with question 3.06)                                                                                                                                                                                                                                                                                                                                                                                                                                                                                                                                                                                                                         |
| 3.05 If the previous question is "No": What reasons do <b>you yourself</b> have against general organ donation? (Multiple answers possible) | <input type="checkbox"/> I have no or not enough awareness of the topic<br><input type="checkbox"/> I am afraid or uncertain about death in organ donation process<br><input type="checkbox"/> I am afraid or uncertain about the distortion of my body in the donation process<br><input type="checkbox"/> I have religious, ethic or spiritual reasons against a donation<br><input type="checkbox"/> I believe that my organs are not suitable because of a preexisting disease<br><input type="checkbox"/> I believe that my organs are not suitable because of my age<br><input type="checkbox"/> I am afraid of abuse, have lack of trust (due to negative reporting)<br><input type="checkbox"/> Other: _____ |

| The following questions refer to the patient (from the perspective of the accompanying person).                                                                                                                     |                                                                                                                                                                                                                                                                                                                                                                                                                                                                                                                                                                                                                                                                                                                                                      |
|---------------------------------------------------------------------------------------------------------------------------------------------------------------------------------------------------------------------|------------------------------------------------------------------------------------------------------------------------------------------------------------------------------------------------------------------------------------------------------------------------------------------------------------------------------------------------------------------------------------------------------------------------------------------------------------------------------------------------------------------------------------------------------------------------------------------------------------------------------------------------------------------------------------------------------------------------------------------------------|
| 3.06 Would you agree to <b>donate the patient's eyes</b> after death?<br>(Multiple answers possible)                                                                                                                | <input type="checkbox"/> No, I generally refuse to donate<br><input type="checkbox"/> Yes, for tissue transplantation for immediate healing of another patient (e.g. cornea transplantation)<br><input type="checkbox"/> Yes, for research (e.g. microscopic examination of the retina)<br><input type="checkbox"/> Yes, for teaching medical students (e.g. training in anatomy)<br><input type="checkbox"/> Yes, for teaching prospective ophthalmologists (e.g. surgical training)<br><input type="checkbox"/> Other: _____                                                                                                                                                                                                                       |
| 3.07 If you have answered question 3.06 with "no":<br>In your opinion, what are the reasons for not <b>donating the patient's eyes</b> after his/her death?<br>(Multiple answers possible)                          | <input type="checkbox"/> I have no or not enough awareness of the topic<br><input type="checkbox"/> I am afraid or uncertain about death in organ donation process<br><input type="checkbox"/> I am afraid or uncertain about the distortion of the donor's body in the donation process<br><input type="checkbox"/> I have religious, ethic or spiritual reasons against a donation<br><input type="checkbox"/> I believe that the patient's eyes are not suitable because of a preexisting disease<br><input type="checkbox"/> I believe that the patient's eyes are not suitable because of her/his age<br><input type="checkbox"/> I am afraid of abuse, have lack of trust (due to negative reporting)<br><input type="checkbox"/> Other: _____ |
| 3.08 <u>Regardless of my actual decision</u> , I think it would be appropriate for the ophthalmologist to address me openly on the subject of <b>eye donation after the death of the patient</b> I am accompanying. | <input type="checkbox"/> Does apply (1) - "It is a doctor's job to educate about this subject."<br><input type="checkbox"/> Does rather apply (2)<br><input type="checkbox"/> Partly-partly (3)<br><input type="checkbox"/> Does rather not apply (4)<br><input type="checkbox"/> Does not apply (5) - "No, it would be inappropriate to be addressed by my doctor on this subject"                                                                                                                                                                                                                                                                                                                                                                  |
| 3.09 <u>Regardless of my actual decision</u> , I think it would be appropriate for the ophthalmologist to openly discuss the topic of <b>eye donation with the patient during his/her lifetime</b> .                | <input type="checkbox"/> Does apply (1) - "It is a doctor's job to educate about this subject."<br><input type="checkbox"/> Does rather apply (2)<br><input type="checkbox"/> Partly-partly (3)<br><input type="checkbox"/> Does rather not apply (4)<br><input type="checkbox"/> Does not apply (5) - "No, it would be inappropriate to be addressed by my doctor on this subject"                                                                                                                                                                                                                                                                                                                                                                  |
| 3.10 I consider an education regarding the topic of <b>eye donation</b> to be appropriate through the following channels:<br>(multiple answers possible)                                                            | <input type="checkbox"/> Personal education by ophthalmologist<br><input type="checkbox"/> Personal education by medical assistant staff (e.g. medical assistant[r])<br><input type="checkbox"/> Personal education by family doctor<br><input type="checkbox"/> Education through an information leaflet<br><input type="checkbox"/> Education via television, radio, internet<br><input type="checkbox"/> Other: _____                                                                                                                                                                                                                                                                                                                             |
| 3.11 My opinion as an accompanying person plays a significant role in <u>the patient's decision</u> to donate eyes after death.                                                                                     | <input type="checkbox"/> Does apply (1)<br><input type="checkbox"/> Does rather apply (2)<br><input type="checkbox"/> Partly-partly (3)<br><input type="checkbox"/> Does rather not apply (4)<br><input type="checkbox"/> Does not apply (5)                                                                                                                                                                                                                                                                                                                                                                                                                                                                                                         |
